# Supplementary material for: Trichlorobenzene-substituted azaaryl compounds as novel FGFR inhibitors exhibiting potent antitumor activity in bladder cancer cells in vitro and in vivo
Source: PubMed Central journal article supplement (PMC5041986; doi:10.18632/oncotarget.8380), 2016-03-25
Supplement: oncotarget-07-26374-s001.pdf [file oncotarget-07-26374-s001.pdf]

## SUPPLEMENTARY MATERIAL AND METHODS

### Synthesis of compound 1 (MPT0L145)

#### 2,4-dichloro-1,3,5-triazine (b)

A mixture of sodium dicyanamide (**a**) (3.0g, 33.70mmol) was dissolved in H<sub>2</sub>O (13ml) and added to another flask which filled with conc. HCl (15ml) at -78°C. The reaction stirred at -78°C for 15min then heated to -35°C for 15min. Let the reaction cool to the 0°C and filtered to get the precipitant. Take another flask filled with DM (10ml) at room temperature and added the POCl<sub>3</sub> (1.84ml, 19.71mmol) and DMF (1.53ml, 19.71mmol) at 0°C. After stirred a while, the reaction was added the above precipitant portion-wisely and stirred at room temperature for overnight. The reaction was quenched by water and extracted by ethyl acetate (30ml x 3). The residue was purified by flash column over silica gel (ethyl acetate: n-Hexane = 1:4, Rf = 0.63) to afford **b** (0.64g, 13.13%) as a white solid. <sup>1</sup>H-NMR (300MHz, CDCl<sub>3</sub>): δ 8.90 (s, 1H).

#### 4-chloro-*N*-methyl-1,3,5-triazin-2-amine (c)

A mixture of **b** (0.10g, 0.67mmol) and IPA (3ml) was stirred for a while then added the 2M methylamine in THF (0.67ml, 1.34mmol) at 0°C and stirred back to room temperature for overnight. The reaction was quenched by water and extracted by ethyl acetate (30ml x 3). The residue was purified by flash column over silica gel (ethyl acetate: n-Hexane = 1:1, Rf= 0.50) to afford **c** (0.07g, 72.27%) as a pale white solid. <sup>1</sup>H-NMR (300MHz, CDCl<sub>3</sub>): δ 3.03-3.06 (m, 3H), 5.71 (br, 1H), 8.36 (d, *J*= 42.0 Hz, 1H).

#### *N*<sup>2</sup>-(4-(4-ethylpiperazin-1-yl)phenyl)-*N*<sup>4</sup>-methyl-1,3,5-triazine-2,4-diamine (d)

A mixture of 4-(4-Ethyl-piperazin-1-yl)-phenylamine (0.10g, 0.48mmol), AcOH (2ml) and H<sub>2</sub>O (0.5ml) was added the **c** (0.07g, 0.48mmol) and refluxed for overnight. The reaction was quenched by saturated NaHCO<sub>3</sub> (aq.) and extracted by ethyl acetate (30ml x 3). The residue was purified by flash column over silica gel (dichloromethane: methanol = 9:1, Rf = 0.28) to afford **d** (0.05g, 33.24%) as a pale yellow solid. <sup>1</sup>H-NMR (300MHz, CDCl<sub>3</sub>): δ 1.13 (t, *J*= 7.2 Hz, 3H), 2.46 (q, *J*= 7.2 Hz, 2H), 2.62 (t, *J*= 5.1 Hz, 4H), 2.98 (d, *J*= 5.1 Hz, 3H), 3.19 (t, *J*= 5.1 Hz, 4H), 5.17-5.29 (m, 1H), 5.55 (br, 1H), 6.91 (d, *J*= 8.7 Hz, 2H), 7.37 (d, *J*= 8.1 Hz, 1H), 7.46 (s, 1H), 8.20 (d, *J*= 44.7 Hz, 1H).

#### 1-(4-((4-(4-ethylpiperazin-1-yl)phenyl)amino)-1,3,5-triazin-2-yl)-1-methyl-3-(2,4,6-trichloro-3,5-dimethoxyphenyl)urea (1)

A mixture of 2,4,6-Trichloro-3,5-dimethoxy-phenylamine (0.39g, 1.52mmol) and *p*-dioxane (7ml) was added the triphosgene (0.75g, 2.52mmol) dissolved in toluene (3ml) and then stirred and refluxed for overnight. The reaction was directly removed out solvent and dissolved in toluene (10ml). The mixture was added the **d** (0.40g, 1.28mmol) and stirred and refluxed for overnight. The reaction was quenched by saturated NaHCO<sub>3</sub>(aq.) and extracted by ethyl acetate (30ml x 3). The residue was purified by flash column over silica gel (dichloromethane: methanol = 15:1, Rf = 0.35) to afford **1** (0.12g, 15.73%) as a pale yellow solid. <sup>1</sup>H-NMR (500MHz, CDCl<sub>3</sub>+CD<sub>3</sub>OD): δ 1.02 (t, *J*= 7.5 Hz, 3H), 2.37 (q, *J*= 7.5 Hz, 2H), 2.46-2.53 (m, 4H), 2.89-3.09 (m, 4H), 3.41 (s, 3H), 3.76 (s, 3H), 3.79 (s, 3H), 6.59-6.84 (m, 2H), 7.14-7.31 (m, 2H), 8.32 (s, 1H).

### Synthesis of compound 23-35

#### 6-chloro-*N*-methylpyrimidin-4-amine (8)

A mixture of 4,6-dichloropyrimidine (0.50g, 3.36mmol) and IPA (1.5ml) was stirred for a while then added the 2M methylamine in THF (4.2ml, 8.40mmol) at 0°C and stirred back to room temperature for overnight. The reaction was quenched by water and extracted by ethyl acetate (30ml x 3). The residue was purified by flash column over silica gel (ethyl acetate: n-Hexane = 1:2, Rf= 0.20) to afford **8** (0.47g, 97.43%) as a pale yellow solid. <sup>1</sup>H-NMR (300MHz, CDCl<sub>3</sub>): δ 2.95 (d, *J*= 5.1 Hz, 3H), 5.26 (br, 1H), 6.34 (s, 1H), 8.34 (s, 1H).

#### 6-chloro-*N*-methyl-2-phenylpyrimidin-4-amine (9)

A mixture of 2-phenyl-4,6-dichloropyrimidine (0.25g, 1.11mmol) and IPA (3ml) was stirred for a while then added the 2M methylamine in THF (1.39ml, 2.78mmol) at 0°C and stirred back to room temperature for overnight. The reaction was quenched by water and extracted by ethyl acetate (30ml x 3). The residue was purified by flash column over silica gel (ethyl acetate: n-Hexane = 1:4, Rf= 0.18) to afford **9** (0.22g, 90.23%) as a pale yellow solid. <sup>1</sup>H-NMR (300MHz, CDCl<sub>3</sub>): δ 3.02 (d, *J*= 4.2 Hz, 3H), 5.09 (br, 1H), 6.26 (s, 1H), 7.42-7.46 (m, 3H), 8.35-8.37 (m, 2H).

### ***N*<sup>4</sup>-(4-(4-ethylpiperazin-1-yl)phenyl)-*N*<sup>6</sup>-methylpyrimidine-4,6-diamine (10)**

A mixture of 4-(4-Ethyl-piperazin-1-yl)-phenylamine (0.49g, 2.39mmol), H<sub>2</sub>O (0.75ml) and AcOH (3ml) was added the **8** (0.15g, 3.13mmol) and refluxed for overnight. The reaction was quenched by saturated NaHCO<sub>3</sub> (aq.) and extracted by ethyl acetate (30ml x 3). The residue was purified by flash column over silica gel (dichloromethane: methanol = 9:1, Rf = 0.25) to afford **10** (0.60g, 80.20%) as a pale orange solid. <sup>1</sup>H-NMR (300MHz, CDCl<sub>3</sub>): δ 1.16 (t, *J*= 7.2 Hz, 3H), 2.48 (q, *J*= 7.2 Hz, 2H), 2.64 (t, *J*= 5.1 Hz, 4H), 2.81 (d, *J*= 5.4 Hz, 3H), 3.22 (t, *J*= 5.1 Hz, 4H), 4.86 (s, 1H), 5.54 (s, 1H), 6.69 (s, 1H), 6.95 (d, *J*= 9.0 Hz, 2H), 7.18 (d, *J*= 8.7 Hz, 2H), 8.14 (s, 1H).

### ***N*<sup>4</sup>-(4-(4-ethylpiperazin-1-yl)phenyl)-*N*<sup>6</sup>-methyl-2-phenylpyrimidine-4,6-diamine (11)**

A mixture of 4-(4-Ethyl-piperazin-1-yl)-phenylamine (0.16g, 0.77mmol), H<sub>2</sub>O (0.4ml) and AcOH (1.6ml) was added the **9** (0.22g, 1.00mmol) and refluxed for overnight. The reaction was quenched by saturated NaHCO<sub>3</sub> (aq.) and extracted by ethyl acetate (30ml x 3). The residue was purified by flash column over silica gel (dichloromethane: methanol = 9:1, Rf = 0.35) to afford **11** (0.22g, 73.54%) as a pale yellow solid. <sup>1</sup>H-NMR (500MHz, CDCl<sub>3</sub>): δ 1.16 (t, *J*= 7.5 Hz, 3H), 2.52 (q, *J*= 7.5 Hz, 2H), 2.66 (t, *J*= 5.0 Hz, 4H), 2.88 (d, *J*= 5.0 Hz, 3H), 3.25 (t, *J*= 5.0 Hz, 4H), 4.84 (s, 1H), 5.51 (s, 1H), 6.51 (s, 1H), 6.95 (d, *J*= 8.5 Hz, 2H), 7.23 (d, *J*= 8.5 Hz, 2H), 7.42-7.43 (m, 3H), 8.31-8.33 (m, 2H).

### **6-(4-(4-ethylpiperazin-1-yl)phenyl)-*N*-methylpyrimidin-4-amine (12)**

A mixture of 1-(4-bromophenyl)piperazine (0.15g, 0.62mmol) and acetone (5ml) was added the potassium carbonate (0.17g, 1.24mmol) and ethyl iodide (0.08ml, 1.00mmol) and stirred at room temperature for 4hrs. The residue was purified by flash column over silica gel (dichloromethane: methanol = 9:1, Rf = 0.43) to get the product. A mixture of above product and p-dioxane (10ml) was added the PdCl<sub>2</sub>dppf (0.04g, 0.06mmol), potassium acetate (0.55g, 5.58mmol) and bispinacolactoboron (0.71g, 2.79mmol) and stirred and refluxed for overnight. The residue was purified by flash column over silica gel (dichloromethane: methanol = 9:1, Rf = 0.48) to get the product. A mixture of **8** (0.06g, 0.41mmol), H<sub>2</sub>O (1ml) and p-dioxane (4ml) was added the PdCl<sub>2</sub>dppf (0.03g, 0.04mmol), cesium carbonate (0.27g, 0.82mmol) and above product (0.13g, 0.41mmol) then stirred and refluxed

for overnight. The reaction was quenched by saturated NaHCO<sub>3</sub>(aq.) and extracted by ethyl acetate (30ml x 3). The residue was purified by flash column over silica gel (dichloromethane: methanol = 19:1, Rf = 0.19) to afford **12** (0.08g, 65.61%) as a pale yellow solid. <sup>1</sup>H-NMR (500MHz, CDCl<sub>3</sub>): δ 1.16 (t, *J*= 7.0 Hz, 3H), 2.52 (d, *J*= 7.0 Hz, 2H), 2.65 (s, 4H), 3.00 (d, *J*= 5.0 Hz, 3H), 3.35 (s, 4H), 4.92 (s, 1H), 6.62 (s, 1H), 6.97 (d, *J*= 7.0 Hz, 2H), 7.93 (d, *J*= 9.0 Hz, 2H), 8.59 (s, 1H).

### ***N*-methyl-6-phenylpyrimidin-4-amine (13)**

A mixture of **8** (0.28g, 1.95mmol), H<sub>2</sub>O (1.5ml) and p-dioxane (6ml) was added the PdCl<sub>2</sub>dppf (0.14g, 0.20mmol), cesium carbonate (1.27g, 3.90mmol) and phenylboronic acid (0.24g, 1.95mmol) then stirred and refluxed for overnight. The reaction was quenched by saturated NaHCO<sub>3</sub>(aq.) and extracted by ethyl acetate (30ml x 3). The residue was purified by flash column over silica gel (ethyl acetate: n-Hexane = 1:2, Rf = 0.30) to afford **13** (0.25g, 69.21%) as a pale yellow solid. <sup>1</sup>H-NMR (300MHz, CD<sub>3</sub>OD): δ 2.95 (s, 3H), 6.84 (s, 1H), 7.45-7.48 (m, 3H), 7.89 (s, 2H), 8.45 (s, 1H).

### **6-(4-methoxyphenyl)-*N*-methylpyrimidin-4-amine (14)**

A mixture of **8** (0.28g, 1.95mmol), H<sub>2</sub>O (1.5ml) and p-dioxane (6ml) was added the PdCl<sub>2</sub>dppf (0.14g, 0.20mmol), cesium carbonate (1.27g, 3.90mmol) and 4-methoxybenzeneboronic acid (0.30g, 1.95mmol) then stirred and refluxed for overnight. The reaction was quenched by saturated NaHCO<sub>3</sub>(aq.) and extracted by ethyl acetate (30ml x 3). The residue was purified by flash column over silica gel (ethyl acetate: n-Hexane = 1:1, Rf = 0.18) to afford **14** (0.30g, 71.47%) as a pale yellow solid. <sup>1</sup>H-NMR (300MHz, CDCl<sub>3</sub>): δ 3.01 (d, *J*= 5.1 Hz, 3H), 3.86 (s, 3H), 5.04 (s, 1H), 6.64 (s, 1H), 6.98 (d, *J*= 9.0 Hz, 2H), 7.96 (d, *J*= 8.7 Hz, 2H), 8.61 (s, 1H).

### **6-(4-fluorophenyl)-*N*-methylpyrimidin-4-amine (15)**

A mixture of **8** (0.28g, 1.95mmol), H<sub>2</sub>O (1.5ml) and p-dioxane (6ml) was added the PdCl<sub>2</sub>dppf (0.14g, 0.20mmol), cesium carbonate (1.27g, 3.90mmol) and 4-fluorobenzeneboronic acid (0.27g, 1.95mmol) then stirred and refluxed for overnight. The reaction was quenched by saturated NaHCO<sub>3</sub>(aq.) and extracted by ethyl acetate (30ml x 3). The residue was purified by flash column over silica gel (ethyl acetate: n-Hexane = 1:2, Rf = 0.15) to afford **15** (0.16g, 40.38%) as a pale yellow solid. <sup>1</sup>H-NMR (300MHz, CDCl<sub>3</sub>): δ 3.02 (d, *J*= 5.1 Hz, 3H),

5.10 (s, 1H), 6.65 (s, 1H), 7.12-7.18 (m, 2H), 7.96-8.01 (m, 2H), 8.63 (s, 1H).

#### **6-(4-chlorophenyl)-*N*-methylpyrimidin-4-amine (16)**

A mixture of **8** (0.28g, 1.95mmol), H<sub>2</sub>O (1.5ml) and p-dioxane (6ml) was added the PdCl<sub>2</sub>dppf (0.14g, 0.20mmol), cesium carbonate (1.27g, 3.90mmol) and 4-chlorobenzeneboronic acid (0.30g, 1.95mmol) then stirred and refluxed for overnight. The reaction was quenched by saturated NaHCO<sub>3</sub>(aq.) and extracted by ethyl acetate (30ml x 3). The residue was purified by flash column over silica gel (ethyl acetate: n-Hexane = 1:2, Rf = 0.06) to afford **16** (0.20g, 46.69%) as a pale yellow solid. <sup>1</sup>H-NMR (300MHz, CDCl<sub>3</sub>): δ 3.02 (d, *J* = 5.1 Hz, 3H), 5.11 (s, 1H), 6.66 (s, 1H), 7.44 (d, *J* = 8.7 Hz, 2H), 7.93 (d, *J* = 8.7 Hz, 2H), 8.63 (s, 1H).

#### **4-(6-(methylamino)pyrimidin-4-yl)benzonitrile (17)**

A mixture of **8** (0.28g, 1.95mmol), H<sub>2</sub>O (1.5ml) and p-dioxane (6ml) was added the PdCl<sub>2</sub>dppf (0.14g, 0.20mmol), cesium carbonate (1.27g, 3.90mmol) and 4-cyanobenzeneboronic acid (0.29g, 1.95mmol) then stirred and refluxed for overnight. The reaction was quenched by saturated NaHCO<sub>3</sub>(aq.) and extracted by ethyl acetate (30ml x 3). The residue was purified by flash column over silica gel (ethyl acetate: n-Hexane = 1:2, Rf = 0.23) to afford **17** (0.30g, 73.18%) as a pale yellow solid. <sup>1</sup>H-NMR (300MHz, CD<sub>3</sub>OD): δ 3.05 (d, *J* = 5.4 Hz, 3H), 5.21 (s, 1H), 6.73 (s, 1H), 7.76 (d, *J* = 8.7 Hz, 2H), 8.10 (d, *J* = 8.7 Hz, 2H), 8.67 (s, 1H).

#### **3-(6-(methylamino)pyrimidin-4-yl)benzonitrile (18)**

A mixture of **8** (0.28g, 1.95mmol), H<sub>2</sub>O (1.5ml) and p-dioxane (6ml) was added the PdCl<sub>2</sub>dppf (0.14g, 0.20mmol), cesium carbonate (1.27g, 3.90mmol) and 3-cyanobenzeneboronic acid (0.29g, 1.95mmol) then stirred and refluxed for overnight. The reaction was quenched by saturated NaHCO<sub>3</sub>(aq.) and extracted by ethyl acetate (30ml x 3). The residue was purified by flash column over silica gel (ethyl acetate: n-Hexane = 1:1, Rf = 0.13) to afford **18** (0.33g, 80.45%) as a pale yellow solid. <sup>1</sup>H-NMR (300MHz, CD<sub>3</sub>OD): δ 2.97 (s, 3H), 6.93 (s, 1H), 7.67 (t, *J* = 7.8 Hz, 1H), 7.83 (d, *J* = 7.8 Hz, 1H), 8.23 (d, *J* = 8.7 Hz, 1H), 8.30 (s, 1H), 8.49 (s, 1H).

#### ***N*-methyl-6-(3-nitrophenyl)pyrimidin-4-amine (19)**

A mixture of **8** (0.28g, 1.95mmol), H<sub>2</sub>O (1.5ml) and p-dioxane (6ml) was added the PdCl<sub>2</sub>dppf (0.14g, 0.20mmol), cesium carbonate (1.27g, 3.90mmol) and 3-nitrobenzeneboronic acid (0.33g, 1.95mmol) then stirred and refluxed for overnight. The reaction was quenched by saturated NaHCO<sub>3</sub>(aq.) and extracted by ethyl acetate (30ml x 3). The residue was purified by flash column over silica gel (ethyl acetate: n-Hexane = 1:1, Rf = 0.38) to afford **19** (0.19g, 42.32%) as a pale yellow solid. <sup>1</sup>H-NMR (300MHz, CD<sub>3</sub>OD): δ 2.98 (s, 3H), 6.98 (s, 1H), 7.74 (t, *J* = 8.1 Hz, 1H), 8.34 (d, *J* = 8.1 Hz, 2H), 8.51 (s, 1H), 8.80 (s, 1H).

#### **6-(furan-2-yl)-*N*-methylpyrimidin-4-amine (20)**

A mixture of **8** (0.28g, 1.95mmol), H<sub>2</sub>O (1.5ml) and p-dioxane (6ml) was added the PdCl<sub>2</sub>dppf (0.14g, 0.20mmol), cesium carbonate (1.27g, 3.90mmol) and 2-furanboronic acid (0.22g, 1.95mmol) then stirred and refluxed for overnight. The reaction was quenched by saturated NaHCO<sub>3</sub>(aq.) and extracted by ethyl acetate (30ml x 3). The residue was purified by flash column over silica gel (ethyl acetate: n-Hexane = 2:1, Rf = 0.13) to afford **20** (0.10g, 29.27%) as a pale yellow solid. <sup>1</sup>H-NMR (300MHz, CD<sub>3</sub>OD): δ 3.01 (d, *J* = 5.1 Hz, 3H), 5.11 (s, 1H), 6.55 (d, *J* = 5.1 Hz, 1H), 6.68 (s, 1H), 7.17-7.18 (m, 1H), 7.55 (s, 1H), 8.54 (s, 1H).

#### ***N*-methyl-6-(pyridin-3-yl)pyrimidin-4-amine (21)**

A mixture of **8** (0.05g, 0.35mmol), H<sub>2</sub>O (1ml) and p-dioxane (4ml) was added the PdCl<sub>2</sub>dppf (0.03g, 0.04mmol), cesium carbonate (0.23g, 0.70mmol) and pyridine-3-boronic (0.04g, 0.35mmol) then stirred and refluxed for overnight. The reaction was quenched by saturated NaHCO<sub>3</sub>(aq.) and extracted by ethyl acetate (30ml x 3). The residue was purified by flash column over silica gel (dichloromethane: methanol = 9:1, Rf = 0.44) to afford **21** (0.05g, 76.72%) as a pale yellow solid. <sup>1</sup>H-NMR (300MHz, CD<sub>3</sub>OD): δ 2.97 (s, 3H), 6.93 (s, 1H), 7.53-7.57 (m, 1H), 8.36 (d, *J* = 8.1 Hz, 1H), 8.50 (s, 1H), 8.61-8.63 (m, 1H), 9.08 (s, 1H).

#### ***N*-methyl-6-(pyridin-4-yl)pyrimidin-4-amine (22)**

A mixture of **8** (0.35g, 2.44mmol), H<sub>2</sub>O (1.5ml) and p-dioxane (6ml) was added the PdCl<sub>2</sub>dppf (0.18g, 0.24mmol), cesium carbonate (1.59g, 4.88mmol) and

pyridine-4-boronic (0.30g, 2.44mmol) then stirred and refluxed for overnight. The reaction was quenched by saturated  $\text{NaHCO}_3$ (aq.) and extracted by ethyl acetate (30ml x 3). The residue was purified by flash column over silica gel (ethyl acetate: n-Hexane = 1:2, Rf = 0.10) to afford **22** (0.25g, 55.02%) as a pale yellow solid.  $^1\text{H-NMR}$  (500MHz,  $\text{CD}_3\text{OD}$ ):  $\delta$  2.97 (s, 3H), 6.99 (s, 1H), 7.94 (s, 2H), 8.52 (s, 1H), 8.66 (d,  $J$ = 6.5 Hz, 2H).

**1-(6-((4-(4-ethylpiperazin-1-yl)phenyl)amino)pyrimidin-4-yl)-1-methyl-3-(2,4,6-trichloro-3,5-dimethoxyphenyl)urea (23)**

A mixture of 2,4,6-Trichloro-3,5-dimethoxyphenylamine (0.25g, 0.97mmol) and p-dioxane (7ml) was added the triphosgene (0.48g, 1.61mmol) dissolved in toluene (3ml) and then stirred and refluxed for overnight. The reaction was directly removed out solvent and dissolved in toluene (10ml). The mixture was added the **10** (0.25g, 0.81mmol) and stirred and refluxed for overnight. The reaction was quenched by saturated  $\text{NaHCO}_3$ (aq.) and extracted by ethyl acetate (30ml x 3). The residue was purified by flash column over silica gel (dichloromethane: methanol = 6:1, Rf = 0.35) to afford **23** (0.10g, 20.75%) as a pale yellow solid.  $^1\text{H-NMR}$  (300MHz,  $\text{CDCl}_3$ ):  $\delta$  1.14 (t,  $J$ = 7.2 Hz, 3H), 2.49 (q,  $J$ = 7.2 Hz, 2H), 2.63 (t,  $J$ = 5.1 Hz, 4H), 3.26 (t,  $J$ = 5.4 Hz, 4H), 3.30 (s, 3H), 3.91 (s, 6H), 6.10 (s, 1H), 6.97 (d,  $J$ = 9.0 Hz, 3H), 7.20 (d,  $J$ = 9.0 Hz, 2H), 8.34 (s, 1H), 12.76 (s, 1H).

**1-(6-((4-(4-ethylpiperazin-1-yl)phenyl)amino)-2-phenylpyrimidin-4-yl)-1-methyl-3-(2,4,6-trichloro-3,5-dimethoxyphenyl)urea (24)**

A mixture of 2,4,6-Trichloro-3,5-dimethoxyphenylamine (0.20g, 0.76mmol) and p-dioxane (7ml) was added the triphosgene (0.38g, 1.26mmol) dissolved in toluene (3ml) and then stirred and refluxed for overnight. The reaction was directly removed out solvent and dissolved in toluene (10ml). The mixture was added the **11** (0.25g, 0.64mmol) and stirred and refluxed for overnight. The reaction was quenched by saturated  $\text{NaHCO}_3$ (aq.) and extracted by ethyl acetate (30ml x 3). The residue was purified by flash column over silica gel (dichloromethane: methanol = 6:1, Rf = 0.35) to afford **24** (0.04g, 9.31%) as a pale yellow solid.  $^1\text{H-NMR}$  (300MHz,  $\text{CDCl}_3$ ):  $\delta$  1.16 (t,  $J$ = 7.5 Hz, 3H), 2.51 (q,  $J$ = 7.2 Hz, 2H), 2.66 (t,  $J$ = 5.1 Hz, 4H), 3.27 (t,  $J$ = 5.1 Hz, 4H), 3.83 (s, 3H), 3.97 (s, 6H), 6.99 (d,  $J$ = 9.3 Hz, 2H), 7.49-7.56 (m, 3H), 7.67 (d,  $J$ = 9.0 Hz, 2H), 8.48-8.51 (m, 2H), 10.72 (s, 1H).

**1-(6-(4-(4-ethylpiperazin-1-yl)phenyl)pyrimidin-4-yl)-1-methyl-3-(2,4,6-trichloro-3,5-dimethoxyphenyl)urea (25)**

A mixture of 2,4,6-Trichloro-3,5-dimethoxyphenylamine (0.24g, 0.92mmol) and p-dioxane (7ml) was added the triphosgene (0.45g, 1.53mmol) dissolved in toluene (3ml) and then stirred and refluxed for overnight. The reaction was directly removed out solvent and dissolved in toluene (10ml). The mixture was added the **12** (0.23g, 0.77mmol) and stirred and refluxed for overnight. The reaction was quenched by saturated  $\text{NaHCO}_3$ (aq.) and extracted by ethyl acetate (30ml x 3). The residue was purified by flash column over silica gel (dichloromethane: methanol = 15:1, Rf = 0.43) to afford **25** (0.07g, 15.68%) as a pale yellow solid.  $^1\text{H-NMR}$  (500MHz,  $\text{CDCl}_3$ ):  $\delta$  1.14 (t,  $J$ = 7.0 Hz, 3H), 2.49 (d,  $J$ = 7.0 Hz, 2H), 2.63 (t,  $J$ = 5.0 Hz, 4H), 3.38 (t,  $J$ = 5.0 Hz, 4H), 3.57 (s, 3H), 3.91 (d,  $J$ = 8.0 Hz, 6H), 7.00 (d,  $J$ = 9.0 Hz, 2H), 8.02 (d,  $J$ = 9.0 Hz, 2H), 8.83 (s, 1H), 12.59 (s, 1H).

**1-methyl-1-(6-phenylpyrimidin-4-yl)-3-(2,4,6-trichloro-3,5-dimethoxyphenyl)urea (26)**

A mixture of 2,4,6-Trichloro-3,5-dimethoxyphenylamine (0.25g, 0.97mmol) and p-dioxane (7ml) was added the triphosgene (0.48g, 1.61mmol) dissolved in toluene (3ml) and then stirred and refluxed for overnight. The reaction was directly removed out solvent and dissolved in toluene (10ml). The mixture was added the **13** (0.15g, 0.81mmol) and stirred and refluxed for overnight. The reaction was quenched by saturated  $\text{NaHCO}_3$ (aq.) and extracted by ethyl acetate (30ml x 3). The residue was purified by flash column over silica gel (dichloromethane: methanol = 9:1, Rf = 0.55) to afford **26** (0.22g, 58.07%) as a pale yellow solid.  $^1\text{H-NMR}$  (300MHz,  $\text{CDCl}_3$ ):  $\delta$  3.60 (s, 3H), 3.93 (s, 6H), 7.37 (s, 1H), 7.54-7.56 (m, 3H), 8.06-8.09 (m, 2H), 8.94 (s, 1H), 12.50 (s, 1H).

**1-(6-(4-methoxyphenyl)pyrimidin-4-yl)-1-methyl-3-(2,4,6-trichloro-3,5-dimethoxyphenyl)urea (27)**

A mixture of 2,4,6-Trichloro-3,5-dimethoxyphenylamine (0.25g, 0.97mmol) and p-dioxane (7ml) was added the triphosgene (0.48g, 1.61mmol) dissolved in toluene (3ml) and then stirred and refluxed for overnight. The reaction was directly removed out solvent and dissolved in toluene (10ml). The mixture was added the **14** (0.17g, 0.81mmol) and stirred and refluxed for overnight.

The reaction was quenched by saturated  $\text{NaHCO}_3$ (aq.) and extracted by ethyl acetate (30ml x 3). The residue was purified by flash column over silica gel (ethyl acetate: n-Hexane = 1:1, Rf= 0.45) to afford **27** (0.23g, 57.05%) as a pale yellow solid.  $^1\text{H-NMR}$  (300MHz,  $\text{CDCl}_3$ ):  $\delta$  3.60 (s, 3H), 3.90 (s, 3H), 3.93 (s, 6H), 7.04 (d,  $J= 8.7$  Hz, 2H), 7.30 (s, 1H), 8.06 (d,  $J= 8.7$  Hz, 2H), 8.88 (s, 1H), 12.54 (s, 1H).

#### **1-(6-(4-fluorophenyl)pyrimidin-4-yl)-1-methyl-3-(2,4,6-trichloro-3,5-dimethoxyphenyl)urea (28)**

A mixture of 2,4,6-Trichloro-3,5-dimethoxyphenylamine (0.25g, 0.97mmol) and p-dioxane (7ml) was added the triphosgene (0.48g, 1.61mmol) dissolved in toluene (3ml) and then stirred and refluxed for overnight. The reaction was directly removed out solvent and dissolved in toluene (10ml). The mixture was added the **15** (0.16g, 0.81mmol) and stirred and refluxed for overnight. The reaction was quenched by saturated  $\text{NaHCO}_3$ (aq.) and extracted by ethyl acetate (30ml x 3). The residue was purified by flash column over silica gel (ethyl acetate: n-Hexane = 1:2, Rf= 0.33) to afford **28** (0.10g, 25.42%) as a pale yellow solid.  $^1\text{H-NMR}$  (300MHz,  $\text{CDCl}_3$ ):  $\delta$  3.60 (s, 3H), 3.93 (s, 6H), 7.20-7.26 (m, 2H), 7.33 (s, 1H), 8.08-8.12 (m, 2H), 8.92 (s, 1H), 12.46 (s, 1H).

#### **1-(6-(4-chlorophenyl)pyrimidin-4-yl)-1-methyl-3-(2,4,6-trichloro-3,5-dimethoxyphenyl)urea (29)**

A mixture of 2,4,6-Trichloro-3,5-dimethoxyphenylamine (0.25g, 0.97mmol) and p-dioxane (7ml) was added the triphosgene (0.48g, 1.61mmol) dissolved in toluene (3ml) and then stirred and refluxed for overnight. The reaction was directly removed out solvent and dissolved in toluene (10ml). The mixture was added the **16** (0.15g, 0.81mmol) and stirred and refluxed for overnight. The reaction was quenched by saturated  $\text{NaHCO}_3$ (aq.) and extracted by ethyl acetate (30ml x 3). The residue was purified by flash column over silica gel (ethyl acetate: n-Hexane = 1:2, Rf= 0.38) to afford **29** (0.11g, 27.04%) as a pale yellow solid.  $^1\text{H-NMR}$  (300MHz,  $\text{CDCl}_3$ ):  $\delta$  3.60 (s, 3H), 3.93 (s, 6H), 7.34 (s, 1H), 7.53 (d,  $J= 8.7$  Hz, 2H), 8.04 (d,  $J= 8.7$  Hz, 2H), 8.92 (s, 1H), 12.44 (s, 1H).

#### **1-(6-(4-cyanophenyl)pyrimidin-4-yl)-1-methyl-3-(2,4,6-trichloro-3,5-dimethoxyphenyl)urea (30)**

A mixture of 2,4,6-Trichloro-3,5-dimethoxyphenylamine (0.25g, 0.97mmol) and p-dioxane (7ml) was added the triphosgene (0.48g, 1.61mmol) dissolved in toluene (3ml) and then stirred and refluxed for overnight. The reaction was directly removed out solvent and dissolved in toluene (10ml). The mixture was added the **17** (0.17g, 0.81mmol) and stirred and refluxed for overnight.

The reaction was quenched by saturated  $\text{NaHCO}_3$ (aq.) and extracted by ethyl acetate (30ml x 3). The residue was purified by flash column over silica gel (ethyl acetate: n-Hexane = 1:2, Rf= 0.23) to afford **30** (0.12g, 30.07%) as a pale yellow solid.  $^1\text{H-NMR}$  (300MHz,  $\text{CDCl}_3$ ):  $\delta$  3.61 (s, 3H), 3.93 (s, 6H), 7.40 (s, 1H), 7.84 (d,  $J= 5.4$  Hz, 2H), 8.20 (d,  $J= 8.7$  Hz, 2H), 8.98 (s, 1H), 12.32 (s, 1H).

#### **1-(6-(3-cyanophenyl)pyrimidin-4-yl)-1-methyl-3-(2,4,6-trichloro-3,5-dimethoxyphenyl)urea (31)**

A mixture of 2,4,6-Trichloro-3,5-dimethoxyphenylamine (0.25g, 0.97mmol) and p-dioxane (7ml) was added the triphosgene (0.48g, 1.61mmol) dissolved in toluene (3ml) and then stirred and refluxed for overnight. The reaction was directly removed out solvent and dissolved in toluene (10ml). The mixture was added the **18** (0.17g, 0.81mmol) and stirred and refluxed for overnight. The reaction was quenched by saturated  $\text{NaHCO}_3$ (aq.) and extracted by ethyl acetate (30ml x 3). The residue was purified by flash column over silica gel (ethyl acetate: n-Hexane = 2:1, Rf= 0.33) to afford **31** (0.12g, 30.07%) as a pale yellow solid.  $^1\text{H-NMR}$  (300MHz,  $\text{CDCl}_3$ ):  $\delta$  3.60 (s, 3H), 3.92 (s, 6H), 7.36 (s, 1H), 7.66 (t,  $J= 8.1$  Hz, 1H), 7.81 (d,  $J= 7.8$  Hz, 1H), 8.30 (d,  $J= 8.4$  Hz, 1H), 8.39 (s, 1H), 8.95 (s, 1H), 12.33 (s, 1H).

#### **1-methyl-1-(6-(3-nitrophenyl)pyrimidin-4-yl)-3-(2,4,6-trichloro-3,5-dimethoxyphenyl)urea (32)**

A mixture of 2,4,6-Trichloro-3,5-dimethoxyphenylamine (0.25g, 0.97mmol) and p-dioxane (7ml) was added the triphosgene (0.48g, 1.61mmol) dissolved in toluene (3ml) and then stirred and refluxed for overnight. The reaction was directly removed out solvent and dissolved in toluene (10ml). The mixture was added the **19** (0.19g, 0.81mmol) and stirred and refluxed for overnight. The reaction was quenched by saturated  $\text{NaHCO}_3$ (aq.) and extracted by ethyl acetate (30ml x 3). The residue was purified by flash column over silica gel (ethyl acetate: n-Hexane = 1:2, Rf= 0.31) to afford **32** (0.06g, 14.45%) as a pale yellow solid.  $^1\text{H-NMR}$  (300MHz,  $\text{CDCl}_3$ ):  $\delta$  3.64 (s, 3H), 3.93 (s, 6H), 7.44 (s, 1H), 7.75 (t,  $J= 8.1$  Hz, 1H), 8.39-8.47 (m, 2H), 8.94 (s, 1H), 8.99 (s, 1H), 12.36 (s, 1H).

#### **1-(6-(furan-2-yl)pyrimidin-4-yl)-1-methyl-3-(2,4,6-trichloro-3,5-dimethoxyphenyl)urea (33)**

A mixture of 2,4,6-Trichloro-3,5-dimethoxyphenylamine (0.15g, 0.58mmol) and p-dioxane (7ml) was added the triphosgene (0.29g, 0.96mmol) dissolved in toluene (3ml) and then stirred and refluxed for overnight. The reaction was directly removed out solvent and dissolved in toluene (10ml). The mixture was added the **20**

(0.09g, 0.49mmol) and stirred and refluxed for overnight. The reaction was quenched by saturated  $\text{NaHCO}_3$ (aq.) and extracted by ethyl acetate (30ml x 3). The residue was purified by flash column over silica gel (ethyl acetate: n-Hexane = 1:4,  $R_f$ = 0.20) to afford **33** (0.05g, 22.29%) as a pale yellow solid.  $^1\text{H-NMR}$  (300MHz,  $\text{CDCl}_3$ ):  $\delta$  3.58 (s, 3H), 3.93 (s, 6H), 6.62 (d,  $J$ = 5.4 Hz, 1H), 7.33 (d,  $J$ = 6.0 Hz, 2H), 7.64 (s, 1H), 8.80 (s, 1H), 12.47 (s, 1H).

#### **1-methyl-1-(6-(pyridin-3-yl)pyrimidin-4-yl)-3-(2,4,6-trichloro-3,5-dimethoxyphenyl)urea (34)**

A mixture of 2,4,6-Trichloro-3,5-dimethoxyphenylamine (0.25g, 0.97mmol) and p-dioxane (7ml) was added the triphosgene (0.48g, 1.61mmol) dissolved in toluene (3ml) and then stirred and refluxed for overnight. The reaction was directly removed out solvent and dissolved in toluene (10ml). The mixture was added the **21** (0.15g, 0.81mmol) and stirred and refluxed for overnight. The reaction was quenched by saturated  $\text{NaHCO}_3$ (aq.) and extracted by ethyl acetate (30ml x 3). The residue was purified by flash column over silica gel (dichloromethane: methanol = 9:1,  $R_f$  = 0.55) to afford **34** (0.04g, 10.54%)

as a pale yellow solid.  $^1\text{H-NMR}$  (300MHz,  $\text{CDCl}_3$ ):  $\delta$  3.62 (s, 3H), 3.93 (s, 6H), 7.41 (s, 1H), 7.50-7.54 (m, 1H), 8.44 (d,  $J$ = 8.1 Hz, 1H), 8.79 (d,  $J$ = 4.2 Hz, 1H), 8.97 (s, 1H), 9.29 (s, 1H), 12.38 (s, 1H).

#### **1-methyl-1-(6-(pyridin-4-yl)pyrimidin-4-yl)-3-(2,4,6-trichloro-3,5-dimethoxyphenyl)urea (35)**

A mixture of 2,4,6-Trichloro-3,5-dimethoxyphenylamine (0.25g, 0.97mmol) and p-dioxane (7ml) was added the triphosgene (0.48g, 1.61mmol) dissolved in toluene (3ml) and then stirred and refluxed for overnight. The reaction was directly removed out solvent and dissolved in toluene (10ml). The mixture was added the **22** (0.15g, 0.81mmol) and stirred and refluxed for overnight. The reaction was quenched by saturated  $\text{NaHCO}_3$ (aq.) and extracted by ethyl acetate (30ml x 3). The residue was purified by flash column over silica gel (dichloromethane: methanol = 9:1,  $R_f$  = 0.30) to afford **35** (0.20g, 52.68%) as a pale yellow solid.  $^1\text{H-NMR}$  (300MHz,  $\text{CDCl}_3$ ):  $\delta$  3.62 (s, 3H), 3.93 (s, 6H), 7.45 (s, 1H), 8.00 (d,  $J$ = 6.0 Hz, 2H), 8.84 (d,  $J$ = 4.8 Hz, 2H), 9.00 (s, 1H), 12.29 (s, 1H).

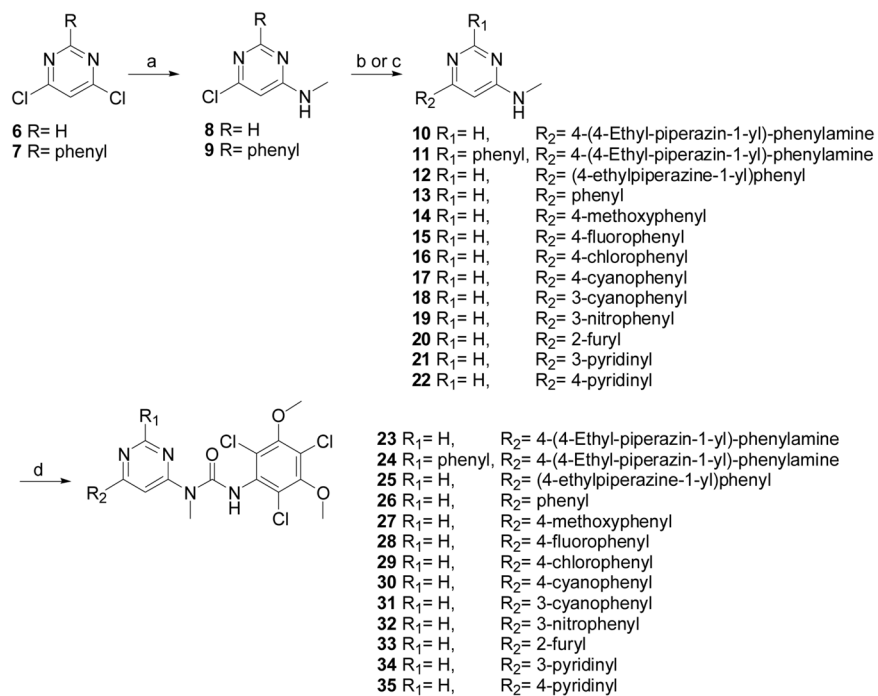

**Supplementary Figure S1: The synthesis of compound 23-35.** Reagents and condition. (a) 2 M Methylamine in THF, IPA, rt; (b) for **10-11**: 4-(4-Ethyl-piperazin-1-yl)-phenylamine, AcOH/H<sub>2</sub>O, reflux; (c) for **12-22**: substituted boronic acid, PdCl<sub>2</sub>(dppf), Cs<sub>2</sub>CO<sub>3</sub>, *p*-dioxane/H<sub>2</sub>O, reflux; (d) 2,4,6-Trichloro-3,5-dimethoxy-phenylamine, triphosgene, *p*-dioxane, toluene, reflux then toluene, reflux. Abbreviations: THF, tetrahydrofuran; IPA, isopropyl alcohol; AcOH, acetic acid.

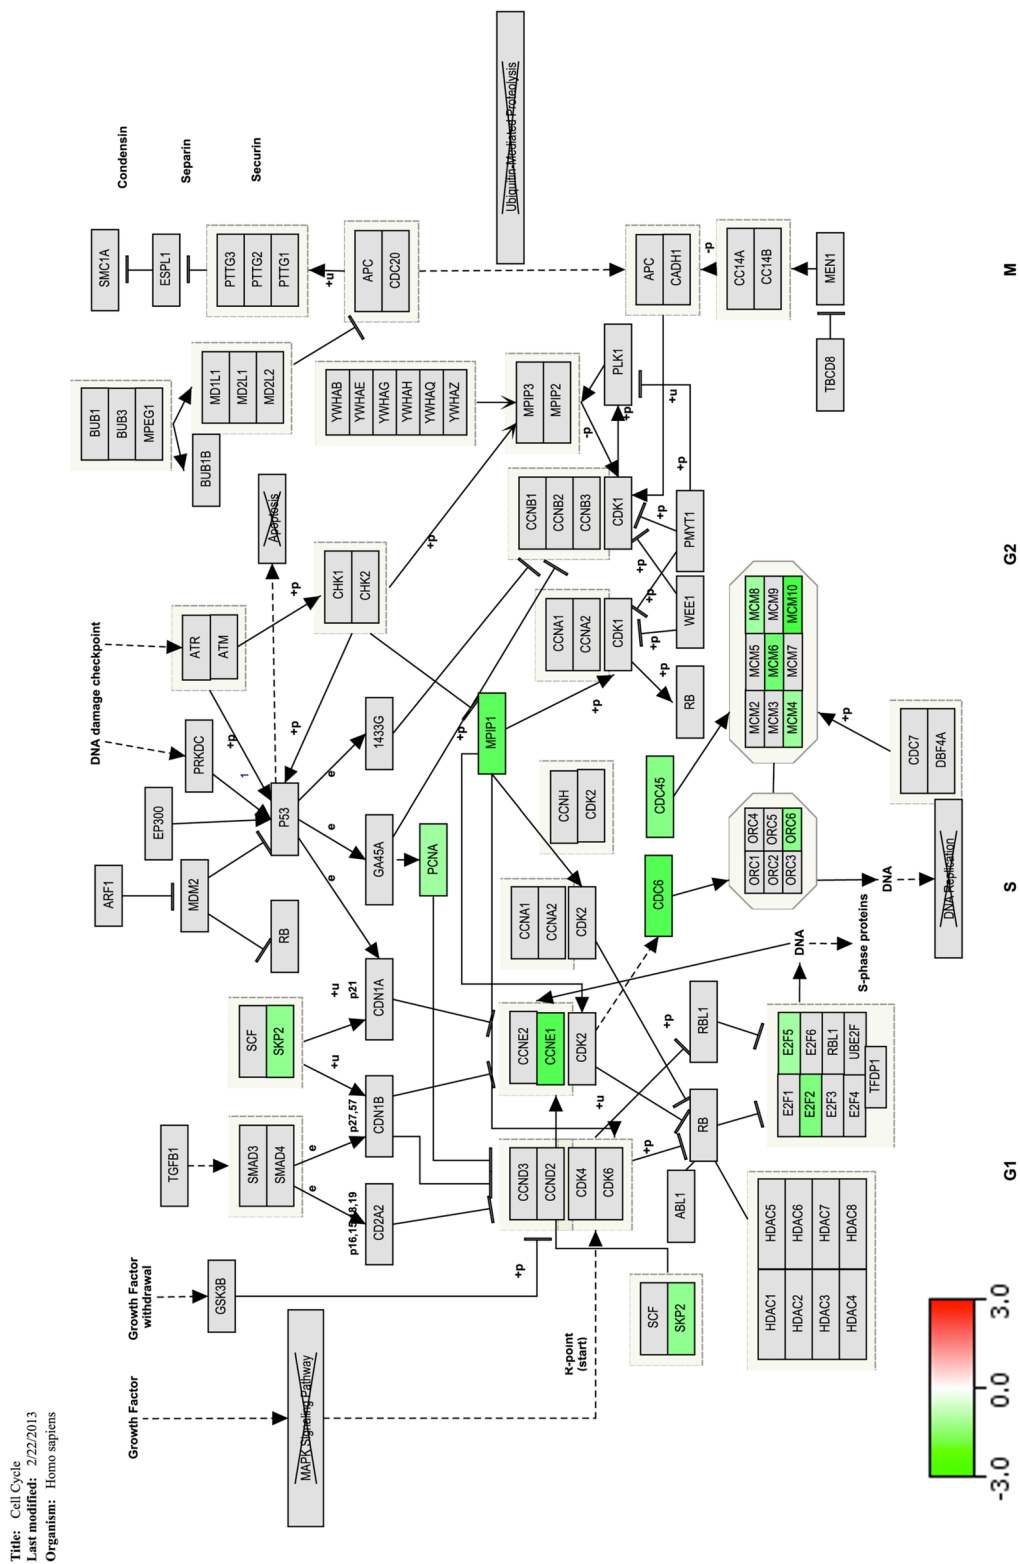

**Supplementary Figure S2: MPT0L145-decreased genes associated with cell cycle.** RT-112 cells were treated with MPT0L145 (4  $\mu$ M) for 8 h. Total RNA was extracted and subjected to cDNA microarray analysis. Downregulated genes associated with cell cycle progression were highlighted in green by the software PathVisio.



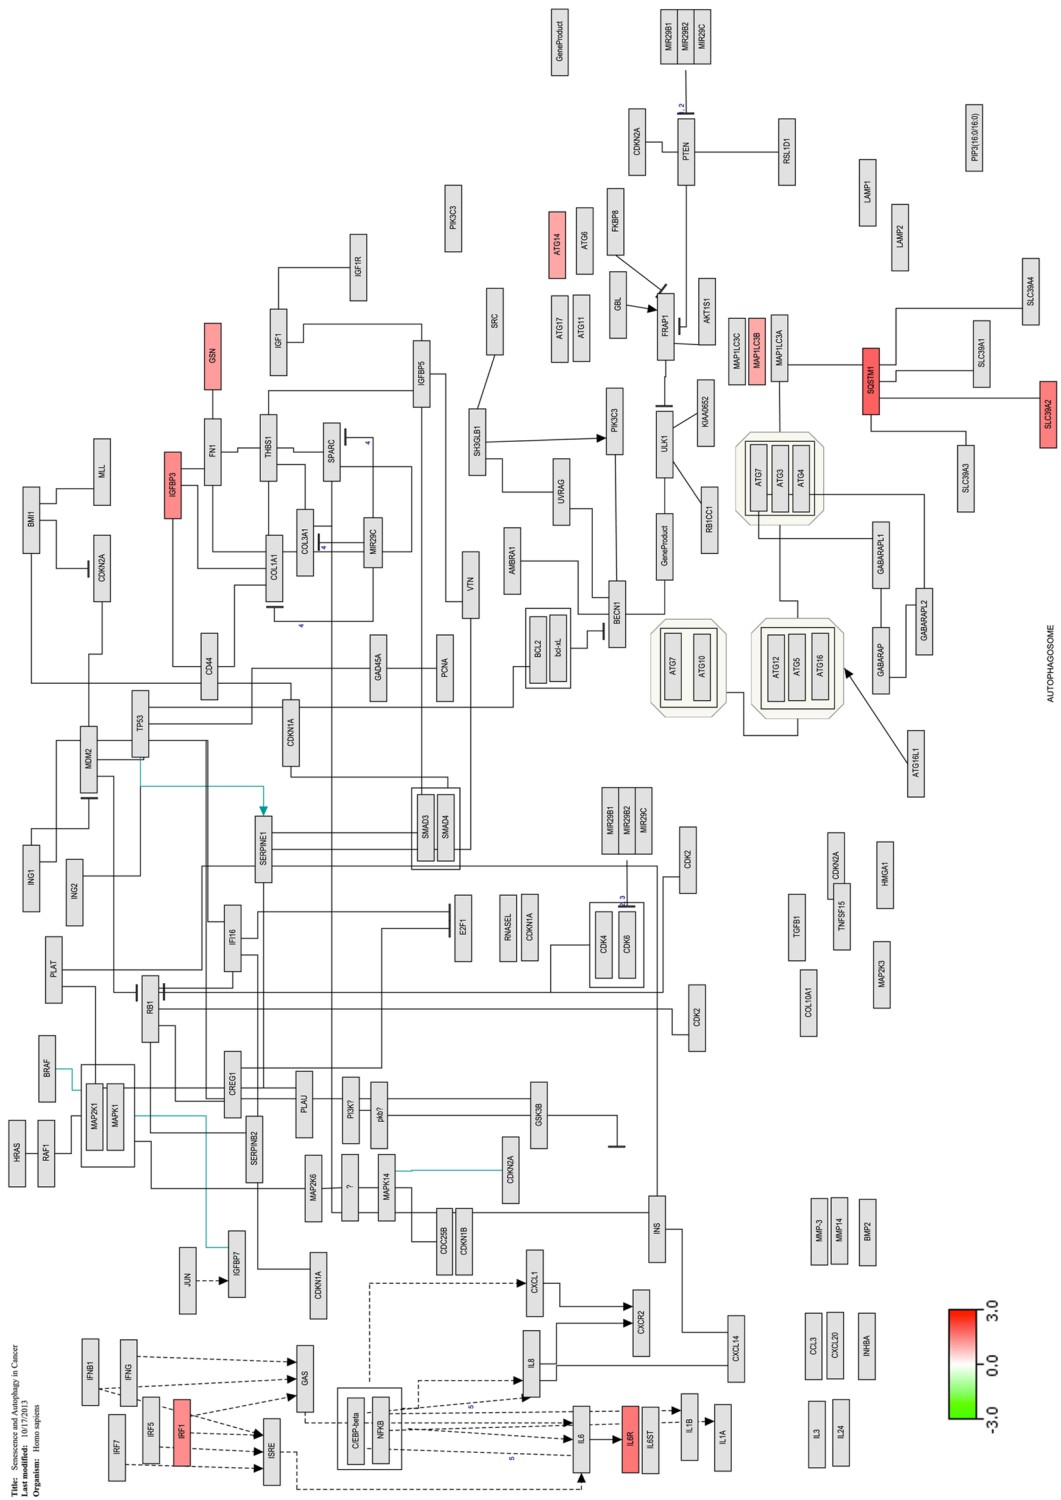

**Title:** Senescence and Autophagy in Cancer  
**Last modified:** 10/17/2013  
**Organization:** Human system

**Supplementary Figure S3: MPT0L145-increased genes associated with senescence and autophagy in cancer.** RT-112 cells were treated with MPT0L145 (4 μM) for 8 h. Total RNA was extracted and subjected to cDNA microarray analysis. Upregulated genes associated with senescence and autophagy were highlighted in red by the software PathVisio.

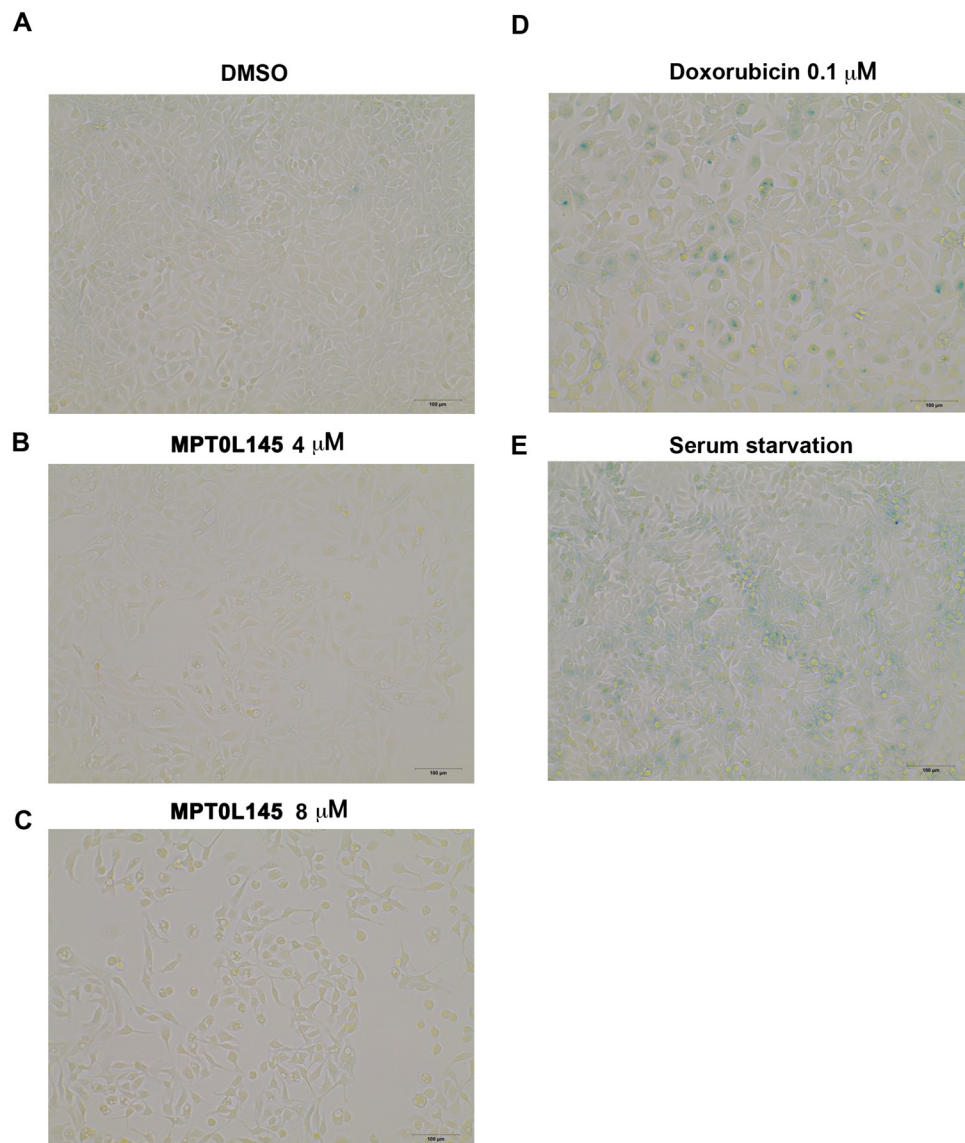

**Supplementary Figure S4: Effect of MPT0L145 on senescence.** RT-112 cells were treated with DMSO **A.** or MPT0L145 at 4 μM **B.** and 8 μM **C.** for 72 hours, and the cells were stained for SA-β-galactosidase activity according to manufacture's instruction (Cell Signaling Technology, Danvers, MA, USA). Doxorubicin **D.** and serum starvation **E.** were served as positive control.

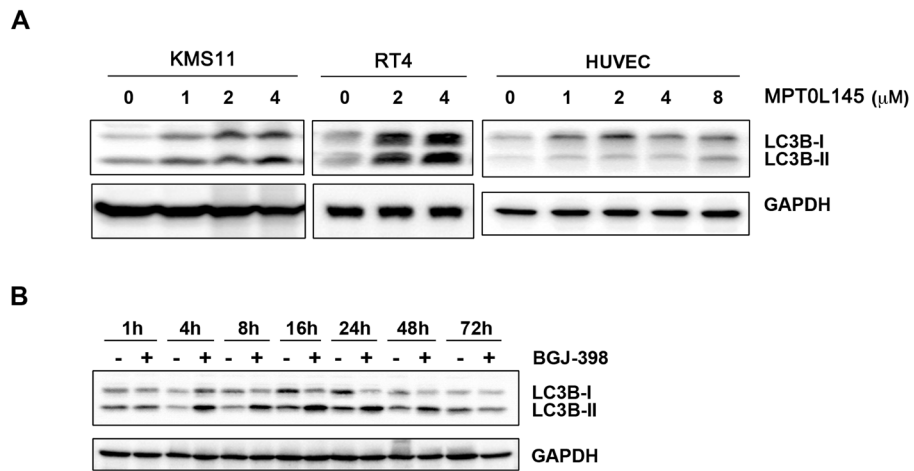

**Supplementary Figure S5: Effects of FGFR inhibitors on the induction of autophagy.** **A.** KMS11, RT4 and HUVEC cells were treated with MPTOL145 for 24 h and protein lysates subjected to western blot analysis. **B.** RT-112 cells were treated with BGJ-398 (4  $\mu$ M) for the indicated times and protein lysates subjected to western blot analysis.

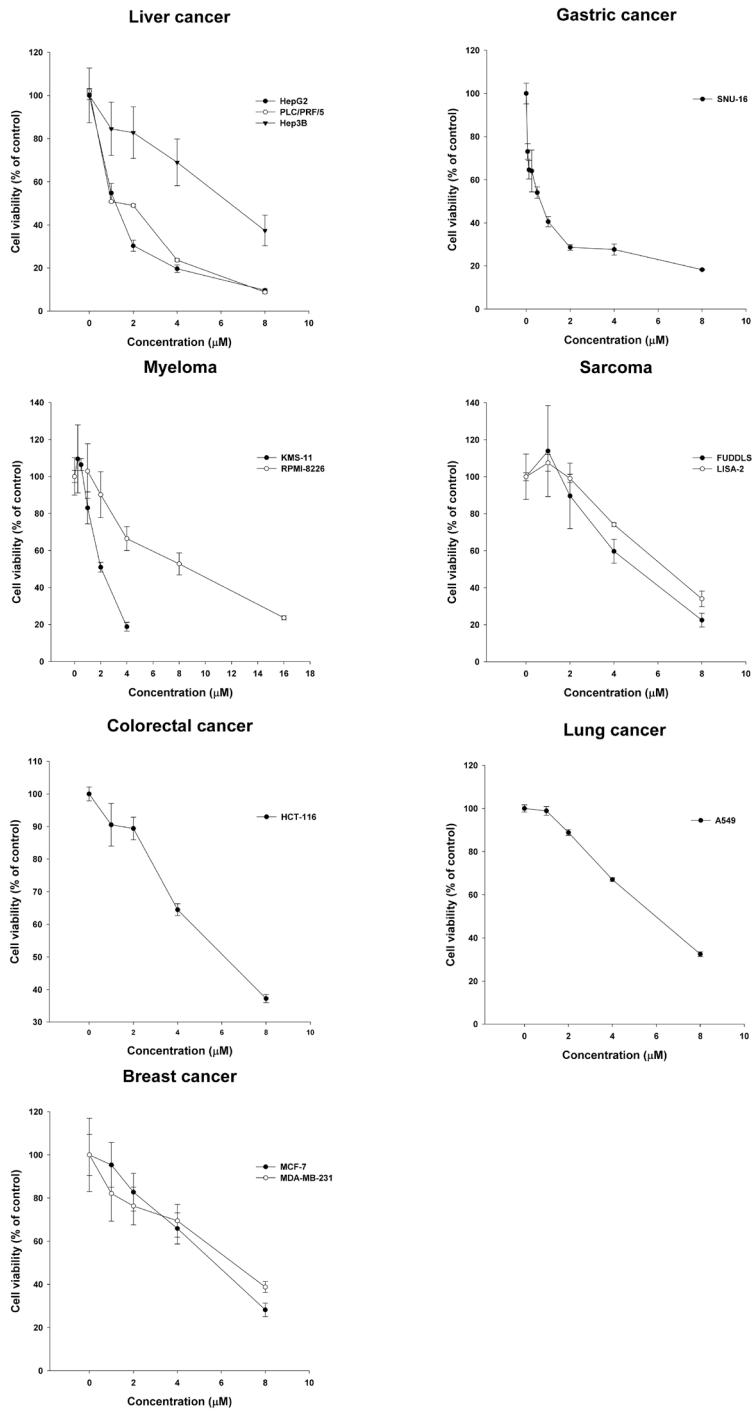

**Supplementary Figure S6: Anti-growth activity of MPT0L145 in various cancer cells.** Different types of cancer cell lines were treated with the indicated concentrations of MPT0L145 for 72 h. Cell viability was assessed the MTT assay. Data are expressed as means ± S.D.

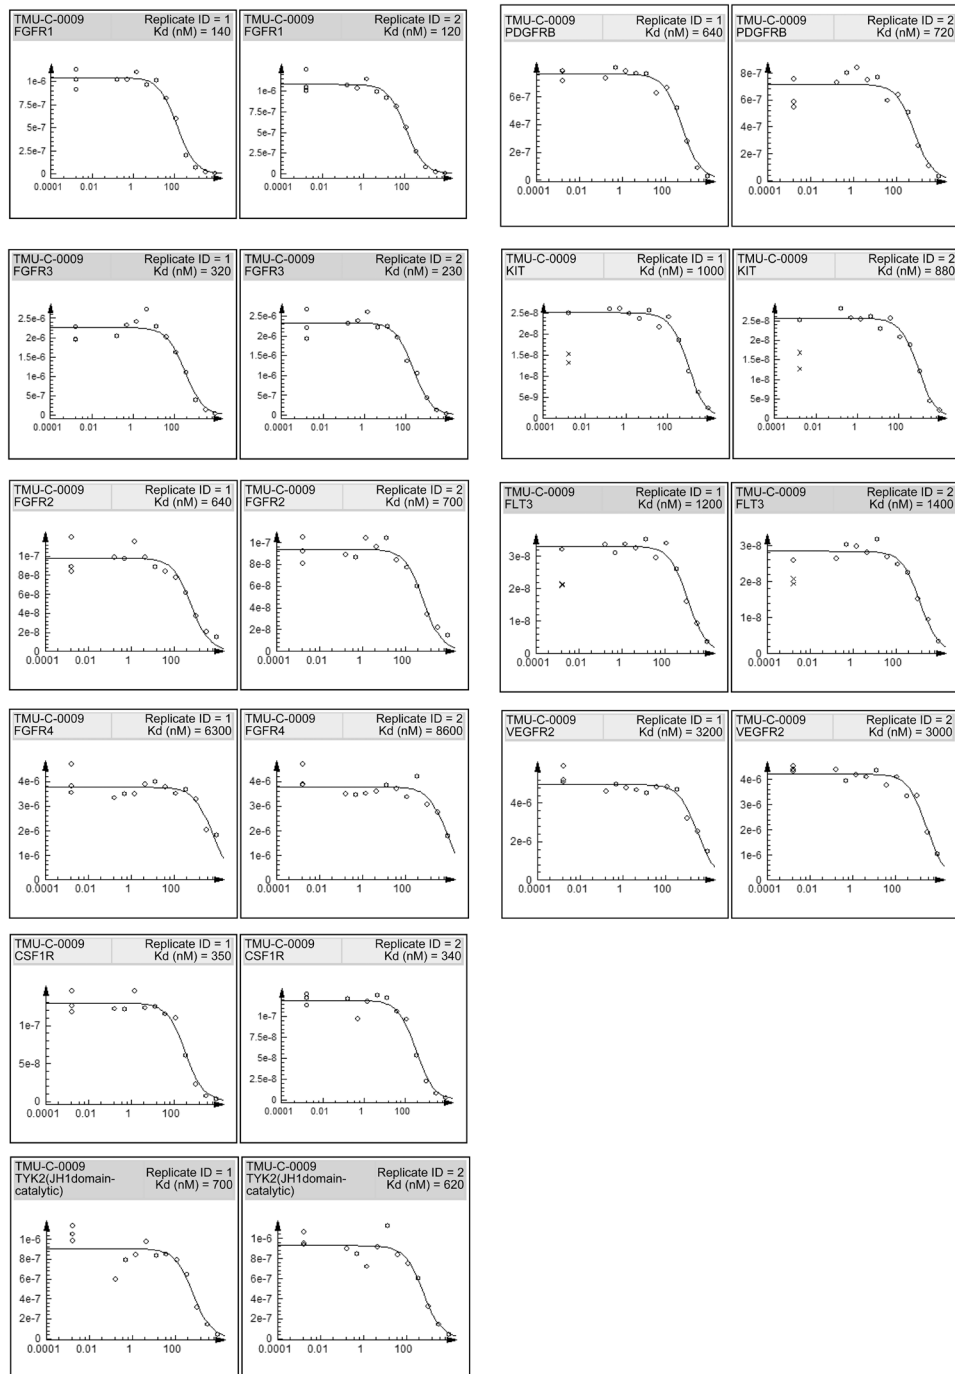

**Supplementary Figure S7: *In vitro* inhibitory effects of MPT0L145 on a panel of protein kinases.** The inhibitory activities of MPT0L145 on protein kinases were assessed by the service of KINOMEScan® (DiscoverRx, Fremont, CA, USA). The screening is based on a competition-binding assay and the K<sub>d</sub> values in duplicates were shown.

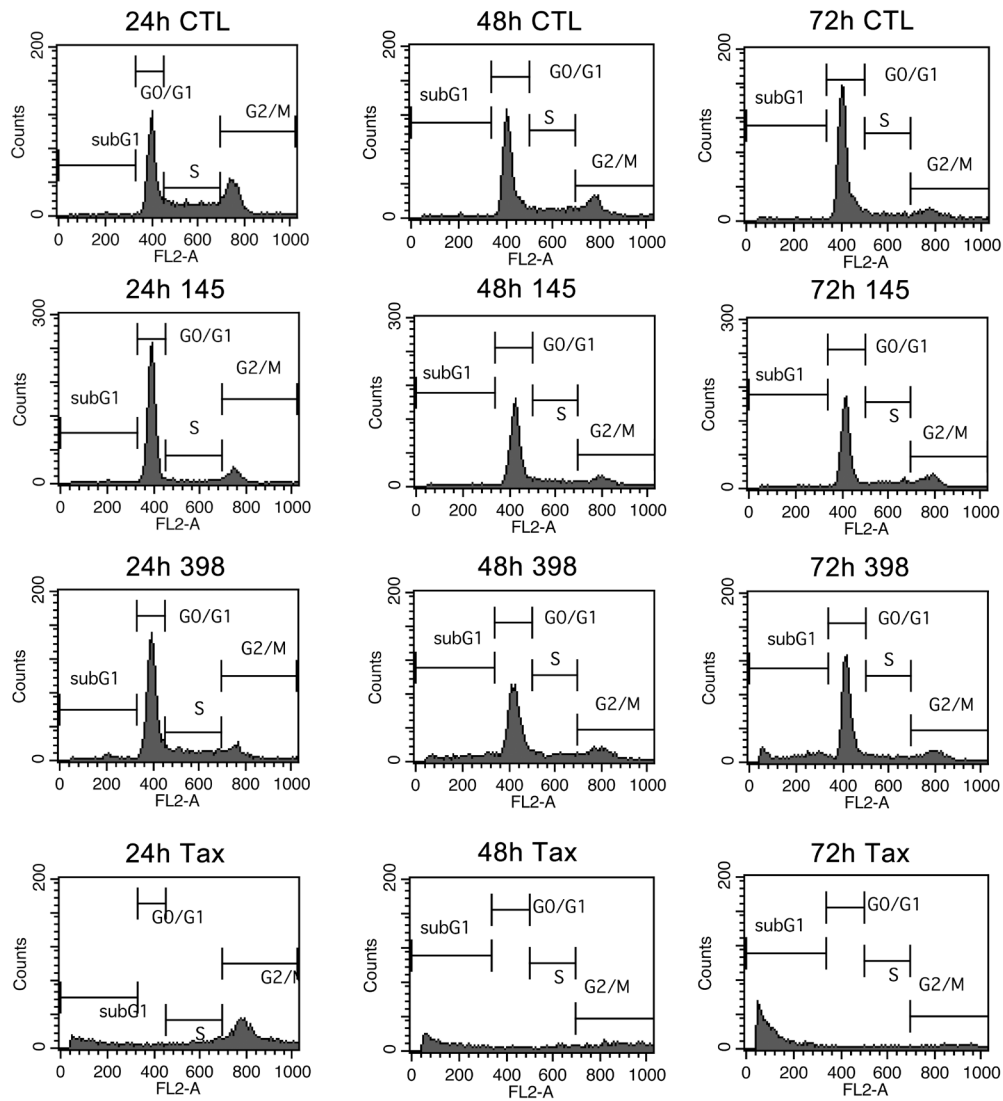

**Supplementary Figure S8: The effects of MPT0L145 on cell cycle distribution in RT-112 cells.** RT-112 cells were treated with MPT0L145 (4  $\mu$ M), BGJ-398 (4  $\mu$ M) and Paclitaxel (0.1  $\mu$ M) for the indicated times, and cell cycle distribution was analyzed via flow cytometry. (CTL: control group, 145: MPT0L145, 398: BGJ-398, Tax: Paclitaxel)

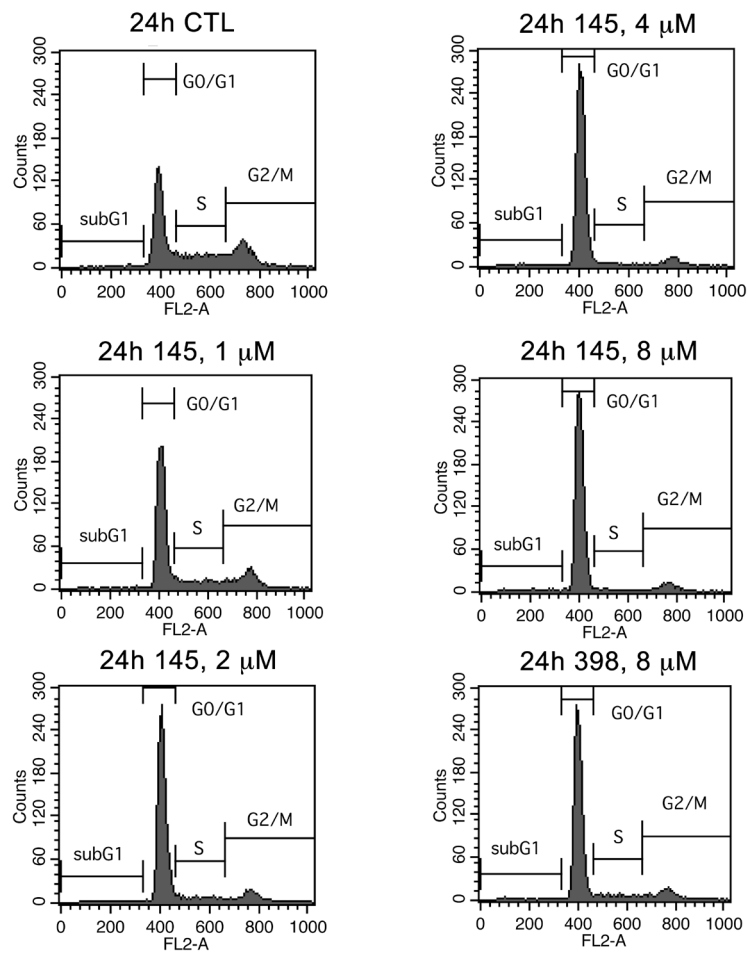

**Supplementary Figure S9: MPT0L145 induced G<sub>0</sub>/G<sub>1</sub> arrest in RT-12 cells.** RT-12 cells were exposed to various concentrations of MPT0L145 and BGJ-398 for 24 h, and cell cycle distribution was analyzed via flow cytometry. (CTL: control group, 145: MPT0L145, 398: BGJ-398)





Table S2: *In vitro* inhibitory effects of MPT0L145 on a panel of protein kinases

| Kinase  | $K_d$ (nM) | Kinase    | $K_d$ (nM) |
|---------|------------|-----------|------------|
| FGFR1   | 130        | IKK-alpha | >10000     |
| FGFR3   | 270        | IKK-beta  | >10000     |
| FGFR2   | 670        | INSR      | >10000     |
| FGFR4   | 7500       | KIT       | >10000     |
| CSF1R   | 340        | LKB1      | >10000     |
| TYK2    | 660        | MAPKAPK2  | >10000     |
| PDGFRB  | 680        | MEK1      | >10000     |
| KIT     | 950        | MEK2      | >10000     |
| FLT3    | 1300       | MET       | >10000     |
| VEGFR2  | 3100       | MKNK1     | >10000     |
| ErbB2   | 10000      | MKNK2     | >10000     |
| ACVR1B  | >10000     | MLK1      | >10000     |
| ADCK3   | >10000     | p38-alpha | >10000     |
| AKT1    | >10000     | p38-beta  | >10000     |
| AKT2    | >10000     | PDGFRA    | >10000     |
| AURKB   | >10000     | PDPK1     | >10000     |
| AXL     | >10000     | PIK3CA    | >10000     |
| BMPR2   | >10000     | PIK3CG    | >10000     |
| BRAF    | >10000     | PIM1      | >10000     |
| BTK     | >10000     | PIM2      | >10000     |
| CDK3    | >10000     | PIM3      | >10000     |
| CDK9    | >10000     | PLK1      | >10000     |
| CSNK1D  | >10000     | PLK3      | >10000     |
| DCAMKL1 | >10000     | RAF1      | >10000     |
| EGFR    | >10000     | RET       | >10000     |
| EPHA2   | >10000     | ROCK2     | >10000     |
| ERBB4   | >10000     | SRPK3     | >10000     |
| ERK1    | >10000     | TGFBR1    | >10000     |
| FAK     | >10000     | TSSK1B    | >10000     |
| GSK3B   | >10000     | YANK3     | >10000     |
| IGF1R   | >10000     | ZAP70     | >10000     |

**Table S3.** *In vitro* antiproliferative activity of MPT0L145 in a panel of cancer cell lines

| Cancer type | Cell name  | IC <sub>50</sub> (μM) | FGFR status (Reference)                              |
|-------------|------------|-----------------------|------------------------------------------------------|
| Bladder     | RT-112     | 1.63±0.01             | FGFR3 overexpression (16)<br>FGFR3-TACC3 fusion (40) |
| Bladder     | RT4        | 4.00±0.58             | FGFR3 overexpression (16)<br>FGFR3-TACC3 fusion (40) |
| Bladder     | T24        | 6.00±0.50             |                                                      |
| Liver       | HepG2      | 1.18±0.16             | FGFR3 and FGFR4 (19)<br>FGFR3-TACC3 fusion (19)      |
| Liver       | PLC/PRF/5  | 1.48±0.30             | FGFR1 and FGFR4 (19)                                 |
| Liver       | Hep3B      | 6.47 ±0.38            |                                                      |
| Gastric     | SNU-16     | 0.65 ± 0.07           | FGFR2 overexpression (7)                             |
| Myeloma     | KMS-11     | 2.05 ±0.11            | FGFR3 mutation (Y373C) (8)                           |
| Myeloma     | RPMI-8226  | 8.51±1.77             |                                                      |
| Sarcoma     | FUDDLS     | 4.74 ±0.49            |                                                      |
| Sarcoma     | LISA-2     | 6.43±0.26             |                                                      |
| Colorectal  | HCT-116    | 6.12±0.01             |                                                      |
| Lung        | A549       | 5.97±0.10             |                                                      |
| Breast      | MCF-7      | 5.98±0.68             |                                                      |
| Breast      | MDA-MB-231 | 6.04 ±0.26            |                                                      |
| Normal cell | HUVEC      | 11.1±2.28             |                                                      |
